# Supplementary material for: Exosomal ANXA1 derived from thyroid cancer cells is associated with malignant transformation of human thyroid follicular epithelial cells by promoting cell proliferation
Source: PubMed Central journal article supplement — Int J Oncol. 2021 Nov 11;59(6):104. doi: 10.3892/ijo.2021.5284 (PMC8651231; doi:10.3892/ijo.2021.5284), 2021-11-11

Figure S1. Exosomes with decreased ANXA1 expression suppress EMT in the Nthy-ori3-1 cells by inactivating TGF- $\beta$ /Smad2 signaling. The SW579 cells were transfected with ANXA1 shRNA2 or NC plasmids. Then, the Nthy-ori3-1 cells were incubated with the exosomes isolated from the conditioned medium of the transfected SW579 cells and treated with TGF- $\beta$ 1. (A) The protein expression level of p-Smad2, E-cadherin and N-cadherin in the Nthy-ori3-1 cells were determined using western blot analysis and the results were (B) quantified and statistically analyzed. \*\*P<0.01. sh, short hairpin; NC, negative control; ANXA1, annexin A1; Exo, exosomes; p, phosphorylated.

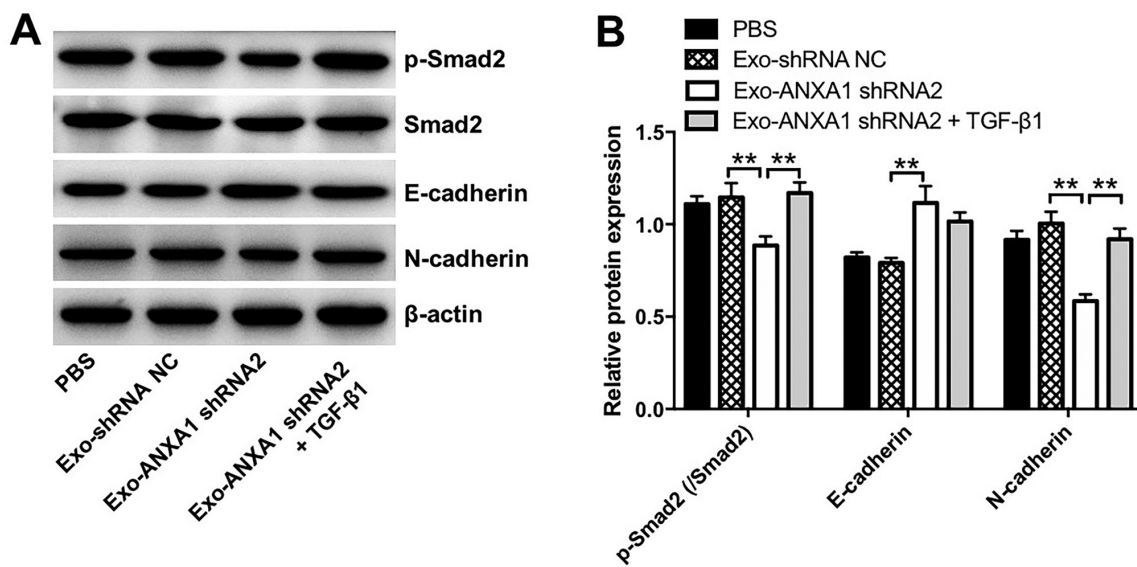

Supplement: Supplementary_Data.pdf [file Supplementary_Data.pdf]
